# Supplementary material for: Human Carboxylesterase 2 Reverses Obesity-Induced Diacylglycerol Accumulation and Glucose Intolerance
Source: PubMed Central journal article supplement (PMC5276805; doi:10.1016/j.celrep.2016.12.070), 2017-01-17
Supplement: mmc1.pdf [file mmc1.pdf]

**Cell Reports, Volume 18**

**Supplemental Information**

**Human Carboxylesterase 2 Reverses**

**Obesity-Induced Diacylglycerol Accumulation**

**and Glucose Intolerance**

**Maxwell A. Ruby, Julie Massart, Devon M. Hunerdosse, Milena Schönke, Jorge C. Correia, Sharon M. Louie, Jorge L. Ruas, Erik Näslund, Daniel K. Nomura, and Juleen R. Zierath**

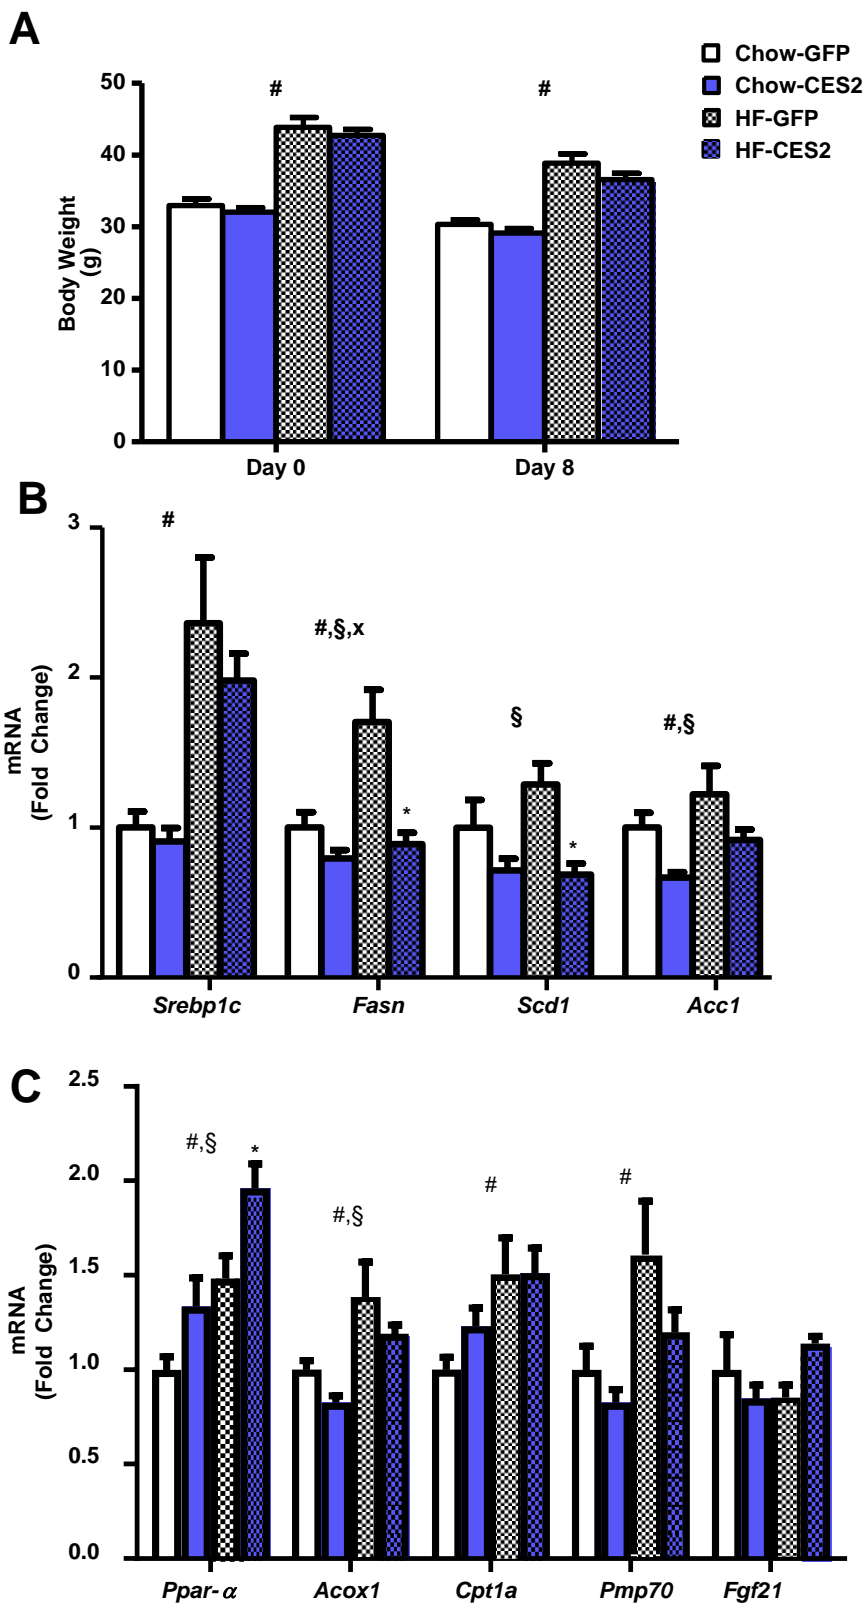

**Supplemental Figure 1. Body Weight and Hepatic Expression of SREBP1c and PPAR $\alpha$  Target Genes in Mice Injected with Ces2 Adenovirus. Related to Figure 3. (A) Body weights of *ad libitum* fed mice on day 0 and 4 h fasted mice on day 8. qPCR analysis of (B) SREBP1c, (C) PPAR $\alpha$  and their target genes (n=12-17). #diet effect, §virus effect, x interaction, \*p<0.05 Bonferroni *post hoc* test.**

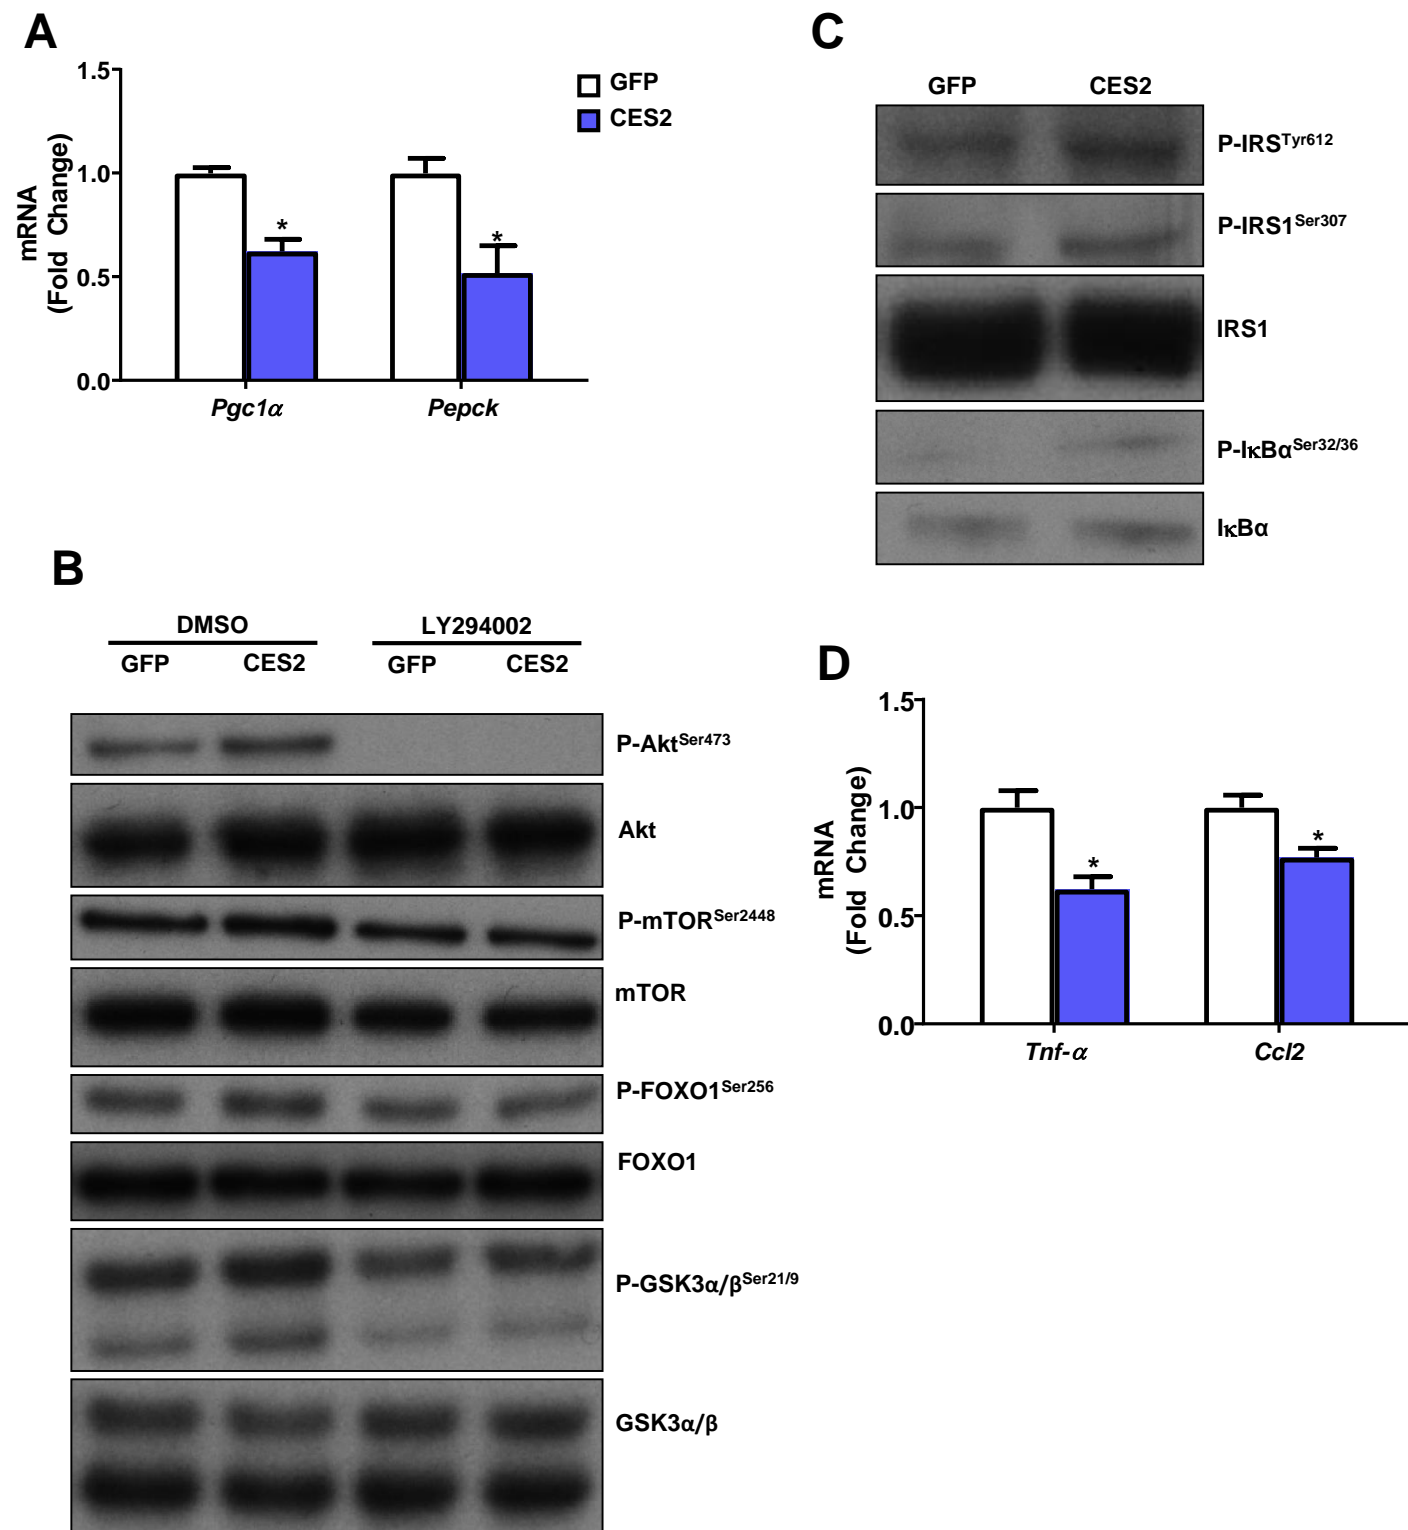

**Supplemental Figure 2. Cell Autonomous Effects of CES2 in Primary Mouse Hepatocytes. Related to Figures 4 and 5.** qPCR analysis of (A) gluconeogenic genes in mouse primary hepatocytes transduced with GFP or CES2 (n=6). Representative western blots of transduced mouse primary hepatocytes (B) treated with DMSO or LY294002 (10  $\mu$ M) for 3 h or (C) untreated hepatocytes (n=6). qPCR analysis of LPS-stimulated (100 ng/ml; 4 h) (D) inflammatory gene expression in primary mouse hepatocytes (n=6). \*p<0.05.

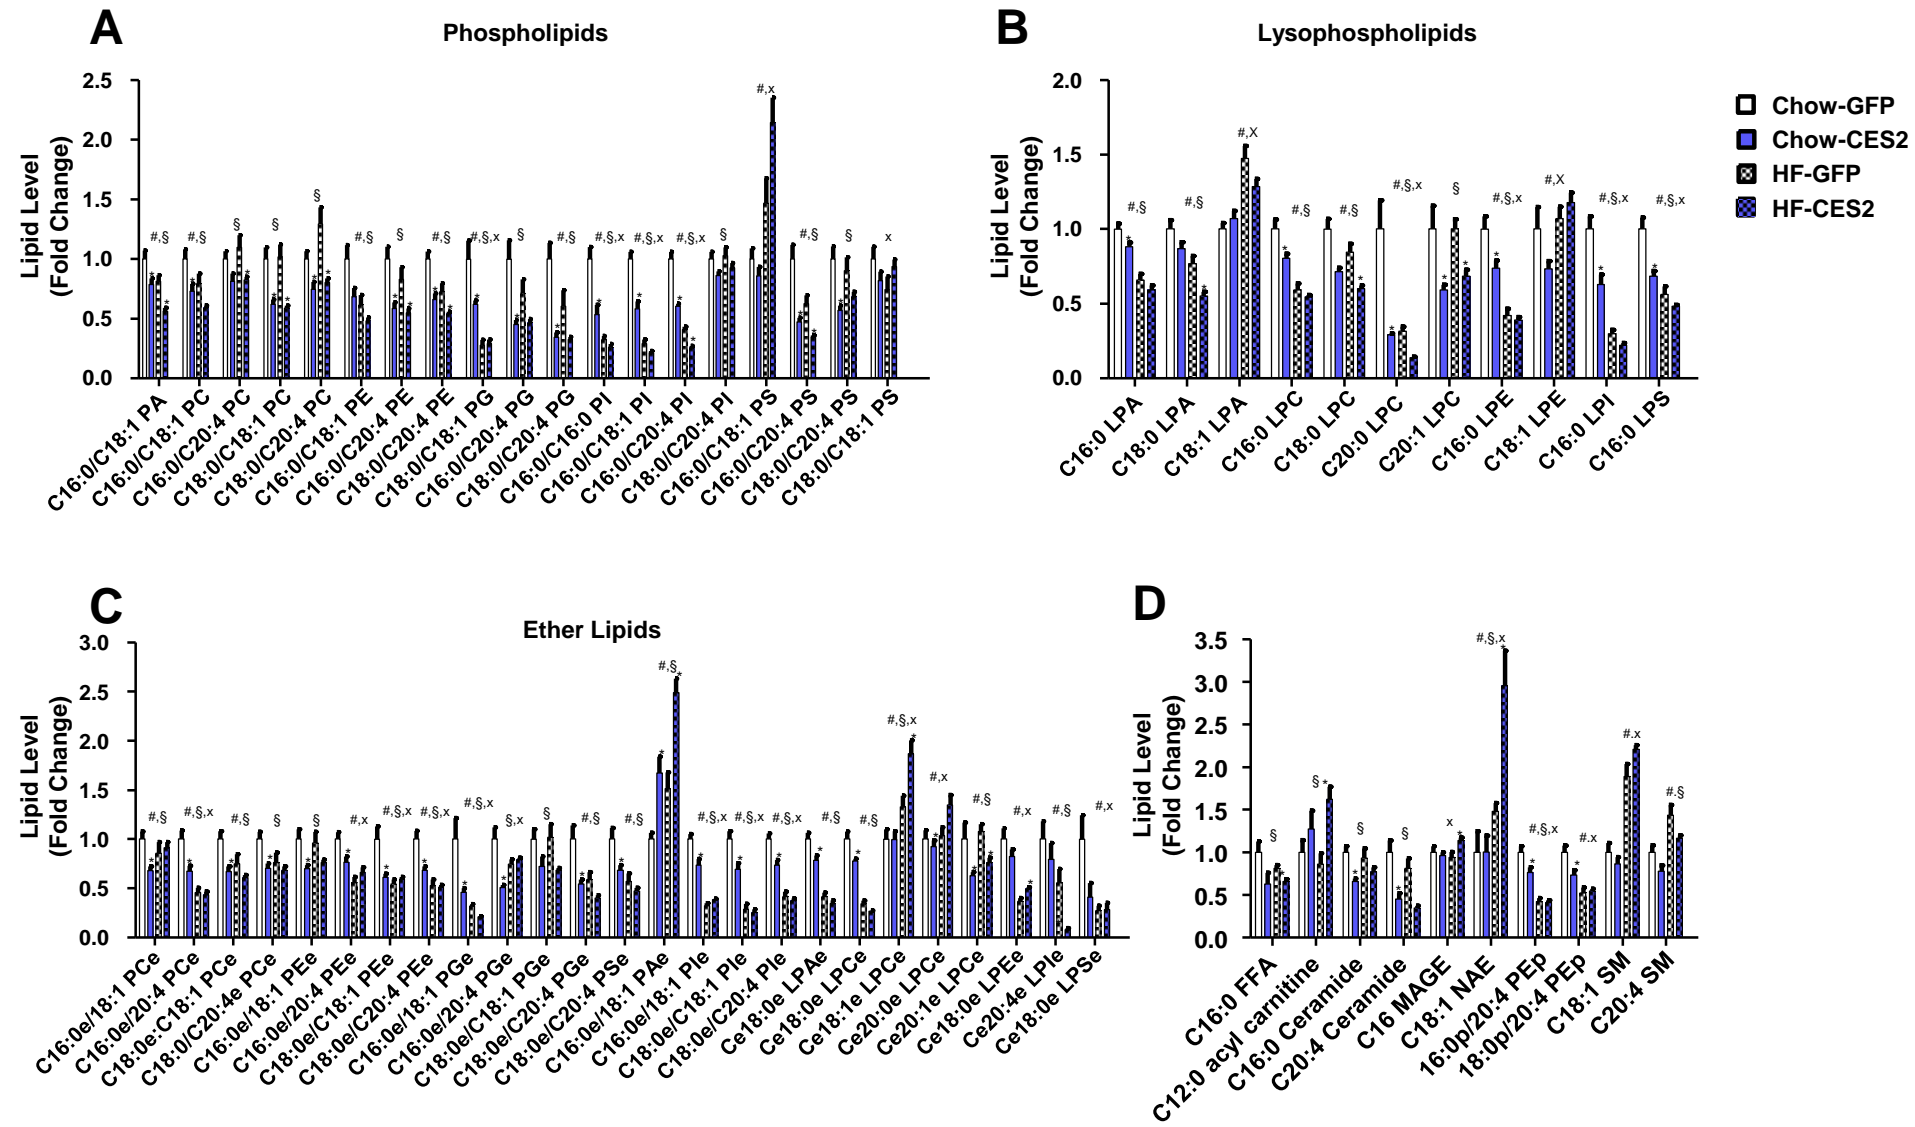

**Supplemental Figure 3. Additional Lipids Significantly altered by CES2 administration. Related to Figure 6.** (A) Phospholipids, (B) Lysophospholipids, (C) Ether Lipids and (D) miscellaneous lipids with significant virus or interaction effects (n=5-6). All main effects were corrected for multiple testing. #diet effect, \$virus effect, xinteraction, \*p<0.05 Bonferroni *post hoc* test.

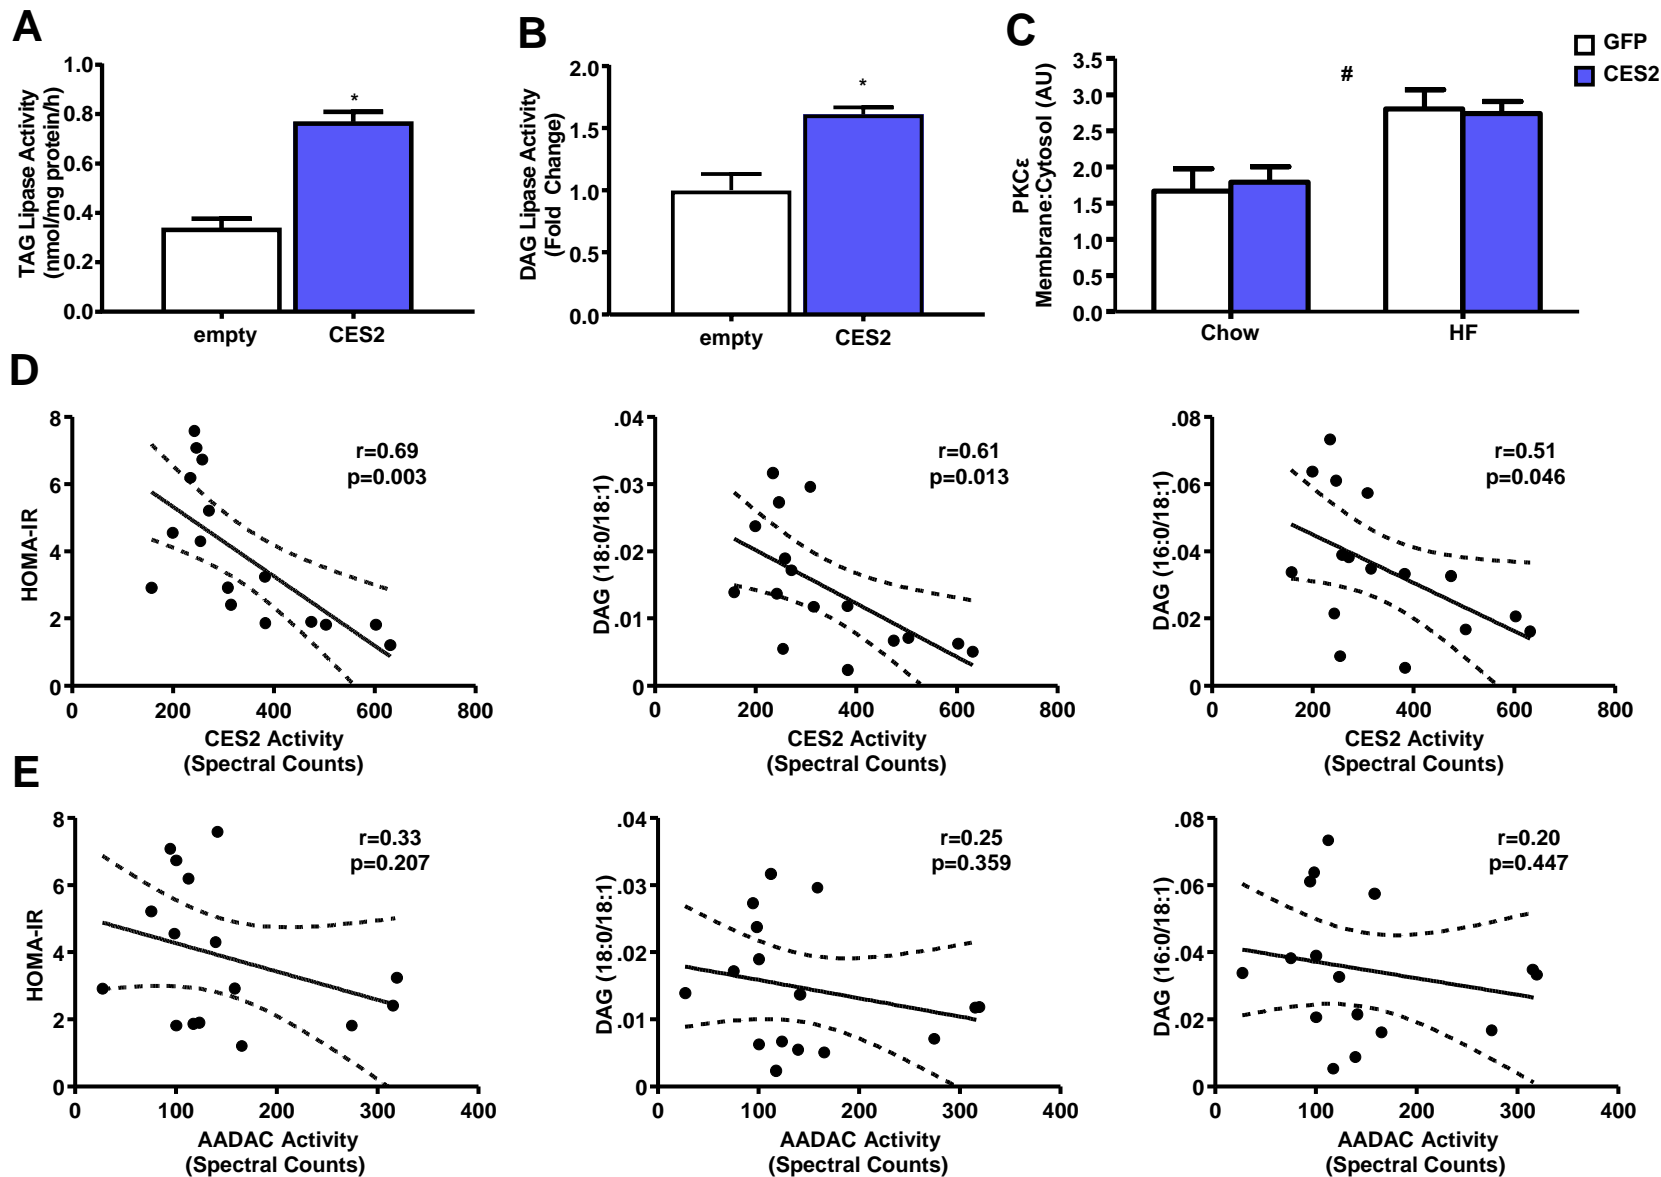

**Supplemental Figure 4. CES2 is a TAG and DAG hydrolase whose Activity Correlates with HOMA-IR and DAG concentrations in Humans. Related to Figure 6.** (A) TAG and (B) DAG hydrolase activities in microsomes isolated from insect cells transduced with human CES2 (n=6-8). \* $p < 0.05$ . (C) Equal amounts of protein from membrane and cytosolic fractions were subjected to Western Blot analysis for total PKC $\epsilon$ . Membrane to cytosol ratio is presented as arbitrary units as different exposures were used to quantify each fraction to ensure the bands remained in the linear range (n=9-10). #diet effect. Linear regression analysis with 95% confidence interval between (D) CES2 and (E) AADAC activities and HOMA-IR and DAG concentrations (n=17).

**Supplemental Table 1: Subject Characteristics, Related to Figure 1**

|                          | Lean        |             | Obese                                          |                                |
|--------------------------|-------------|-------------|------------------------------------------------|--------------------------------|
|                          | Lipidome    | ABPP        | Lipidome                                       | ABPP                           |
| M/F                      | 4/4         | 4/3         | 5/10                                           | 5/4                            |
| Age (years)              | 43.4 ± 4.9  | 43.8 ± 5.6  | 36.0 ± 2.1                                     | 33.2 ± 2.5                     |
| Height (cm)              | 175.6 ± 4.7 | 174.6 ± 5.3 | 170.8 ± 2.1                                    | 174.1 ± 2.7                    |
| Weight (kg)              | 72.5 ± 6.1  | 71.0 ± 6.8  | 118.0 ± 3.2*                                   | 120.6 ± 4.2*                   |
| BMI (kg/m <sup>2</sup> ) | 22.9 ± 0.8  | 22.7 ± 0.9  | 40.6 ± 1.2*                                    | 39.8 ± 1.6*                    |
| Waist (cm)               | 86.6 ± 4.0  | 87.7 ± 4.4  | 123.2 ± 2.6*                                   | 126.2 ± 3.2*                   |
| TG (mmol/l)              | 1.1 ± 0.2   | 1.2 ± 0.2   | 1.7 ± 0.3                                      | 1.8 ± 0.5                      |
| HDL (mmol/l)             | 1.6 ± 0.2   | 1.5 ± 0.1   | 1.2 ± 0.1*                                     | 1.2 ± 0.1                      |
| LDL (mmol/l)             | 2.7 ± 0.5   | 2.8 ± 0.5   | 3.3 ± 0.2                                      | 3.1 ± 0.2                      |
| Cholesterol (mmol/l)     | 4.8 ± 0.5   | 4.9 ± 0.6   | 5.2 ± 0.2                                      | 5.0 ± 0.2                      |
| Glucose (mmol/l)         | 5.9 ± 0.4   | 6.1 ± 0.4   | 5.7 ± 0.2                                      | 5.7 ± 0.1                      |
| HbA1c (mmol/mol)         | 31.9 ± 1.6  | 32.3 ± 1.8  | 34.2 ± 2.4                                     | 31.8 ± 1.5                     |
| Insulin (μU/mL)          | 7.8 ± 1.0   | 8.2 ± 1.1   | n/a                                            | 22.3 ± 1.5*                    |
| HOMA – IR                | 2.0 ± 0.3   | 2.2 ± 0.3   | n/a                                            | 5.9 ± 1.2*                     |
| ASAT (units/l)           | 40.6 ± 6.1  | 42.0 ± 6.8  | n/a                                            | 44.7 ± 8.8                     |
| ALAT (units/l)           | 49.3 ± 9.7  | 52.5 ± 10.5 | n/a                                            | 70.1 ± 21.5                    |
| Medication Use (n)       | 0           | 0           | 1 <sup>π</sup> ,1 <sup>^</sup> ,1 <sup>§</sup> | 1 <sup>π</sup> ,1 <sup>^</sup> |

Data is presented as mean ± S.E.M. n/a: data not available. \* p<0.05 vs. lean controls. <sup>π</sup>Citalopram. <sup>^</sup>Bisoprolol.

<sup>§</sup>Enalapril.

**Supplemental Table 2: Western Blot Quantification, Related to Figures 3, 4, and 5.**

| Target                                   | chow - GFP<br>(n=11-13) | chow - CES2<br>(n=12-14) | HF - GFP (n=9-<br>12) | HF - CES2<br>(n=14-17) |
|------------------------------------------|-------------------------|--------------------------|-----------------------|------------------------|
| <b>Figure 3B</b>                         |                         |                          |                       |                        |
| mouse CES2 <sup>#</sup>                  | 8.7 ± 0.7               | 7.6 ± 0.6 <sup>a</sup>   | 6.3 ± 0.3             | 6.8 ± 0.5 <sup>a</sup> |
| human CES2 <sup>#,§,X</sup>              | 0.3 ± 0.0               | 8.4 ± 0.8*               | 0.4 ± 0.0             | 16.2 ± 1.4*            |
| <b>Figure 4C</b>                         |                         |                          |                       |                        |
| Akt <sup>§</sup>                         | 7.7 ± 0.6               | 9.5 ± 0.5                | 9.0 ± 0.7             | 10.8 ± 0.6             |
| P-Akt (Ser473) <sup>#,§</sup>            | 14.4 ± 2.8              | 23.6 ± 3.3               | 22.4 ± 2.2            | 34.4 ± 4.4*            |
| FoxO1 (C29H4)                            | 5.8 ± 0.5               | 7.5 ± 1.2                | 5.0 ± 0.7             | 7.2 ± 0.5              |
| P-FoxO1 (Ser256) <sup>§</sup>            | 5.5 ± 0.4               | 6.7 ± 0.4                | 5.4 ± 0.4             | 6.7 ± 0.3*             |
| GSK-3α/β <sup>§</sup>                    | 8.4 ± 0.3               | 10.8 ± 0.3*              | 9.1 ± 0.5             | 11.6 ± 0.4*            |
| P-GSK-3α/β (Ser21/9) <sup>#,§</sup>      | 1.3 ± 0.2               | 2.4 ± 0.3*               | 2.4 ± 0.3             | 3.3 ± 0.3*             |
| IRS1 <sup>#</sup>                        | 12.3 ± 0.9              | 11.1 ± 0.8               | 7.4 ± 1.0             | 6.5 ± 0.8              |
| P-IRS1 (Ser307) <sup>#,§,X</sup>         | 6.7 ± 1.3               | 6.2 ± 1.0                | 6.7 ± 0.9             | 16.2 ± 1.8*            |
| P-IRS1 (Tyr612) <sup>§</sup>             | 12.3 ± 1.2              | 10.4 ± 0.9               | 15.6 ± 2.5            | 9.4 ± 2.2              |
| mTOR (7C10)                              | 7.1 ± 0.2               | 7.4 ± 0.1                | 6.9 ± 0.2             | 6.9 ± 0.2              |
| P-mTOR (Ser2448) <sup>§</sup>            | 8.7 ± 0.8               | 12.0 ± 0.9               | 8.6 ± 1.3             | 11.7 ± 1.2             |
| <b>Figure 5A</b>                         |                         |                          |                       |                        |
| CHOP <sup>#,§</sup>                      | 7.0 ± 0.8               | 7.8 ± 0.3                | 10.7 ± 1.2            | 14.7 ± 1.0*            |
| P-eIF2α (Ser51) <sup>#,§</sup>           | 8.7 ± 0.7               | 9.6 ± 0.5                | 6.1 ± 0.8             | 8.9 ± 0.5*             |
| IκBα                                     | 11.2 ± 1.2              | 13.0 ± 1.4               | 11.4 ± 1.3            | 12.7 ± 1.1             |
| P-IκBα (Ser32/36) <sup>#,§</sup>         | 5.6 ± 0.3               | 6.8 ± 0.6                | 8.9 ± 1.0             | 12.4 ± 0.9*            |
| IKKα/β                                   | 6.8 ± 0.2               | 6.9 ± 0.2                | 6.9 ± 0.3             | 7.7 ± 0.3              |
| P-IKKα/β (Ser176/180) <sup>§</sup>       | 7.9 ± 1.1               | 11.7 ± 1.1               | 9.1 ± 1.5             | 14.4 ± 1.3*            |
| JNK <sup>#</sup>                         | 5.3 ± 0.3               | 5.7 ± 0.4                | 4.6 ± 0.3             | 4.7 ± 0.4              |
| P-JNK (Thr183/Tyr185) <sup>§</sup>       | 5.1 ± 0.6               | 8.4 ± 0.7*               | 6.5 ± 0.7             | 7.6 ± 0.4              |
| acetyl-NF-κB p65 (Lys310) <sup>#,§</sup> | 8.0 ± 0.5               | 4.6 ± 0.4*               | 5.3 ± 0.4             | 3.9 ± 0.5              |
| NF-κB p65 <sup>§</sup>                   | 9.9 ± 0.2               | 12.4 ± 0.8               | 9.7 ± 0.8             | 11.7 ± 0.9             |
| P-NF-κB p65 (Ser536)                     | 14.2 ± 1.4              | 12.0 ± 0.8               | 14.9 ± 1.2            | 12.8 ± 0.6             |

Data is presented as mean ± S.E.M. <sup>a</sup>Due to ~30% cross reactivity with human CES2 this data must be interpreted with caution. <sup>#</sup>diet effect, <sup>§</sup> virus effect, <sup>x</sup> interaction, \*p<0.05 Bonferroni *post hoc* test.

## Supplemental Methods

### Primers Used

| Human         | Forward                 | Reverse                  |
|---------------|-------------------------|--------------------------|
| 36b4          | CCCTGAAGTGCTCGACATCA    | TGCGGACACCCTCCAGAA       |
| aadac         | TGCAGGAGGGAATTTAGCTG    | TGACATCTGGGTCAATCAAGG    |
| atf3          | CGCTGGAATCAGTCACTGTC    | TTTCTCGTCGCCTCTTTTTTC    |
| ces2          | GTCTTCGCTTGTGTGTCC      | AACTTGGTCACAGGCAGACA     |
| chop          | AGCCAAAATCAGAGCTGGAA    | CGAAGGAGAAAGGCAATGAC     |
| g6pase        | TGCCCCTGATAAAGCAGTTC    | TCGGCTTTATCTTTCCCTGA     |
| pepck         | GTGCTTTGCTCTCAGGATGG    | CCGCCAGGTACTTCTTCTCA     |
| pgc1 $\alpha$ | GCACCGAAATTCTCCCTTGT    | GCCTCTCGTGCTGATATTC      |
| trib3         | TGCCCTACAGGCACTGAGTA    | GGCGTAGAGGAGCTGGGTA      |
| Mouse         | Forward                 | Reverse                  |
| acc1          | GATGAACCATCTCCGTTGGC    | CCCAATTATGAATCGGGAGTGC   |
| acox1         | TTGGAAACCACTGCCACATA    | GCCAGGACTATCGCATGATT     |
| ccl2          | CCCAATGAGTAGGCTGGAGA    | TCTGGACCCATTCTTCTTG      |
| ccl5          | GCTGCTTTGCCTACCTCTCC    | TCGAGTGACAAACACGACTGC    |
| ces2a         | CTCACAGCCGGCCATGT       | AGATTCATTCCTTCGCATCCT    |
| ces2b         | TCTGAGATGGTCTCCACTACG   | GCAGGGATCATCTGGACAAGC    |
| ces2c         | GCTGAATGCTGGGTTCTTCG    | GCTGCCTTGGATCTGTCTGT     |
| ces2e         | CTTGTCTTTGGCTACCAGTTCG  | TTGCTCCTCTTCCTCAGTGTAAGG |
| ces2f         | TTCAGCGTTCCTCATGCTCCT   | CTTGAGTAAACTGGACCTATGCTG |
| ces2g         | TCTCTGAGGTGGTTTACCAAACG | CCTCTCAGACAGCGCACCAG     |
| ces2h         | AACTGTCTACGAGGCAAAAGCG  | GAGGATGTCTGGGCAGGAAGAT   |
| cpt1a         | ACGGAGTCTGCAACTTTGT     | GTACAGGTGCTGGTGTCTTTTC   |
| cxcl10        | ATGACGGGCCAGTGAGAATG    | ATGATCTCAACACGTGGGCA     |
| cxcr3         | CACAAGTGCCAAAGGCAGAG    | AAGTCCGAGGCATCTAGCAC     |
| emr1          | TCACTGTCTGCTCAACCGTC    | AGAAGTCTGGGAATGGGAGC     |
| fasn          | CCCGGAGTCGCTTGAGTAT     | GGATTTGGTGGAGCCAATTA     |
| g6pase        | CGACTCGCTATCTCCAAGTGA   | GTTGAACCAGTCTCCGACCA     |
| hprt          | AGCAGTACAGCCCCAAAATG    | AGAGGTCTTTTACCAGCA       |
| il1 $\beta$   | CTCATCTGGGATCCTCTCCA    | GGGTCCGTCAACTTCAAAGA     |
| pepck         | CTCCTTTGGAAGCGGATATG    | TGCCTTCGGGGTTAGTTATG     |
| pgc1 $\alpha$ | TATGGAGTGACATAGAGTGTGCT | CCACTTCAATCCACCAGAAAG    |
| pmp70         | TGTTCAAGGACTGGATGGATG   | TGGCAAACCTGGGGTTTATG     |
| ppara         | CCTGAACATCGAGTGTGCGAA   | CAGCTCCGATCACACTTGTC     |
| scd1          | CCTGCGGATCTTCCTTATCA    | GCCATTTCGTACACGTCATT     |
| srebp1c       | GATGTGCGAACTGGACACAG    | GCATGTCTTCGATGTCGTTCAA   |
| tgf1 $\beta$  | GGAGAGCCCTGGATACCAAC    | CGCACACAGCAGTTCTTCTC     |
| tnf $\alpha$  | CCACCACGCTTCTGTCTA      | AGGGTCTGGGCCATAGAACT     |



**Antibodies Used**

| <b>Target</b>                                  | <b>Catalogue #</b> | <b>Company</b>           |
|------------------------------------------------|--------------------|--------------------------|
| Acetyl-NF- $\kappa$ B p65 (Lys310) (D2S3J)     | 12629              | Cell Signaling           |
| Phospho-IKK $\alpha/\beta$ (Ser176/180) (16A6) | 2697               | Cell Signaling           |
| Phospho-I $\kappa$ B $\alpha$ (Ser32/36)       | 9246               | Cell Signaling           |
| Phospho-NF- $\kappa$ B p65 (Ser536)            | 3033               | Cell Signaling           |
| Phospho-SAPK/JNK (Thr183/Tyr185) (81E11)       | 4668               | Cell Signaling           |
| Phospho-eIF2 $\alpha$ (Ser51)                  | 9721               | Cell Signaling           |
| I $\kappa$ B $\alpha$                          | 9242               | Cell Signaling           |
| NF- $\kappa$ B p65                             | 3034               | Cell Signaling           |
| Phospho-FoxO1 (Ser256)                         | 9461               | Cell Signaling           |
| Akt                                            | 9272               | Cell Signaling           |
| mTOR (7C10)                                    | 2983               | Cell Signaling           |
| FoxO1 (C29H4)                                  | 2880               | Cell Signaling           |
| Phospho-Akt (Ser473)                           | 9271               | Cell Signaling           |
| Phospho-mTOR (Ser2448) (D9C2)                  | 5536               | Cell Signaling           |
| GSK-3 $\alpha/\beta$ (D75D3)                   | 5676               | Cell Signaling           |
| Phospho-GSK-3 $\alpha/\beta$ (Ser21/9)         | 9331               | Cell Signaling           |
| JNK                                            | sc-571             | Santa Cruz Biotechnology |
| IKK $\alpha/\beta$ (H-470)                     | sc-7607            | Santa Cruz Biotechnology |
| GADD 153 (B-3)                                 | sc-7351            | Santa Cruz Biotechnology |
| Anti-phospho-IRS1 (Ser307 mouse)               | 05-1087            | Merck Millipore          |
| Anti-IRS1                                      | 06-248             | Merck Millipore          |
| Phospho-IRS1 pTyr612                           | 44-816G            | Thermo Fisher Scientific |
| Human CES2                                     | PA5-34842          | Thermo Fisher Scientific |
| Mouse Carboxylesterase 2/CES2                  | AF5280             | R&D Systems              |
| PKC $\epsilon$                                 | 610086             | BD Biosciences           |
